# Supplementary figures and images for: FCGBP Is a Promising Prognostic Biomarker and Correlates with Immunotherapy Efficacy in Oral Squamous Cell Carcinoma
Source: Hindawi journal article supplement (doi:10.1155/2022/8443392), 2022-06-12

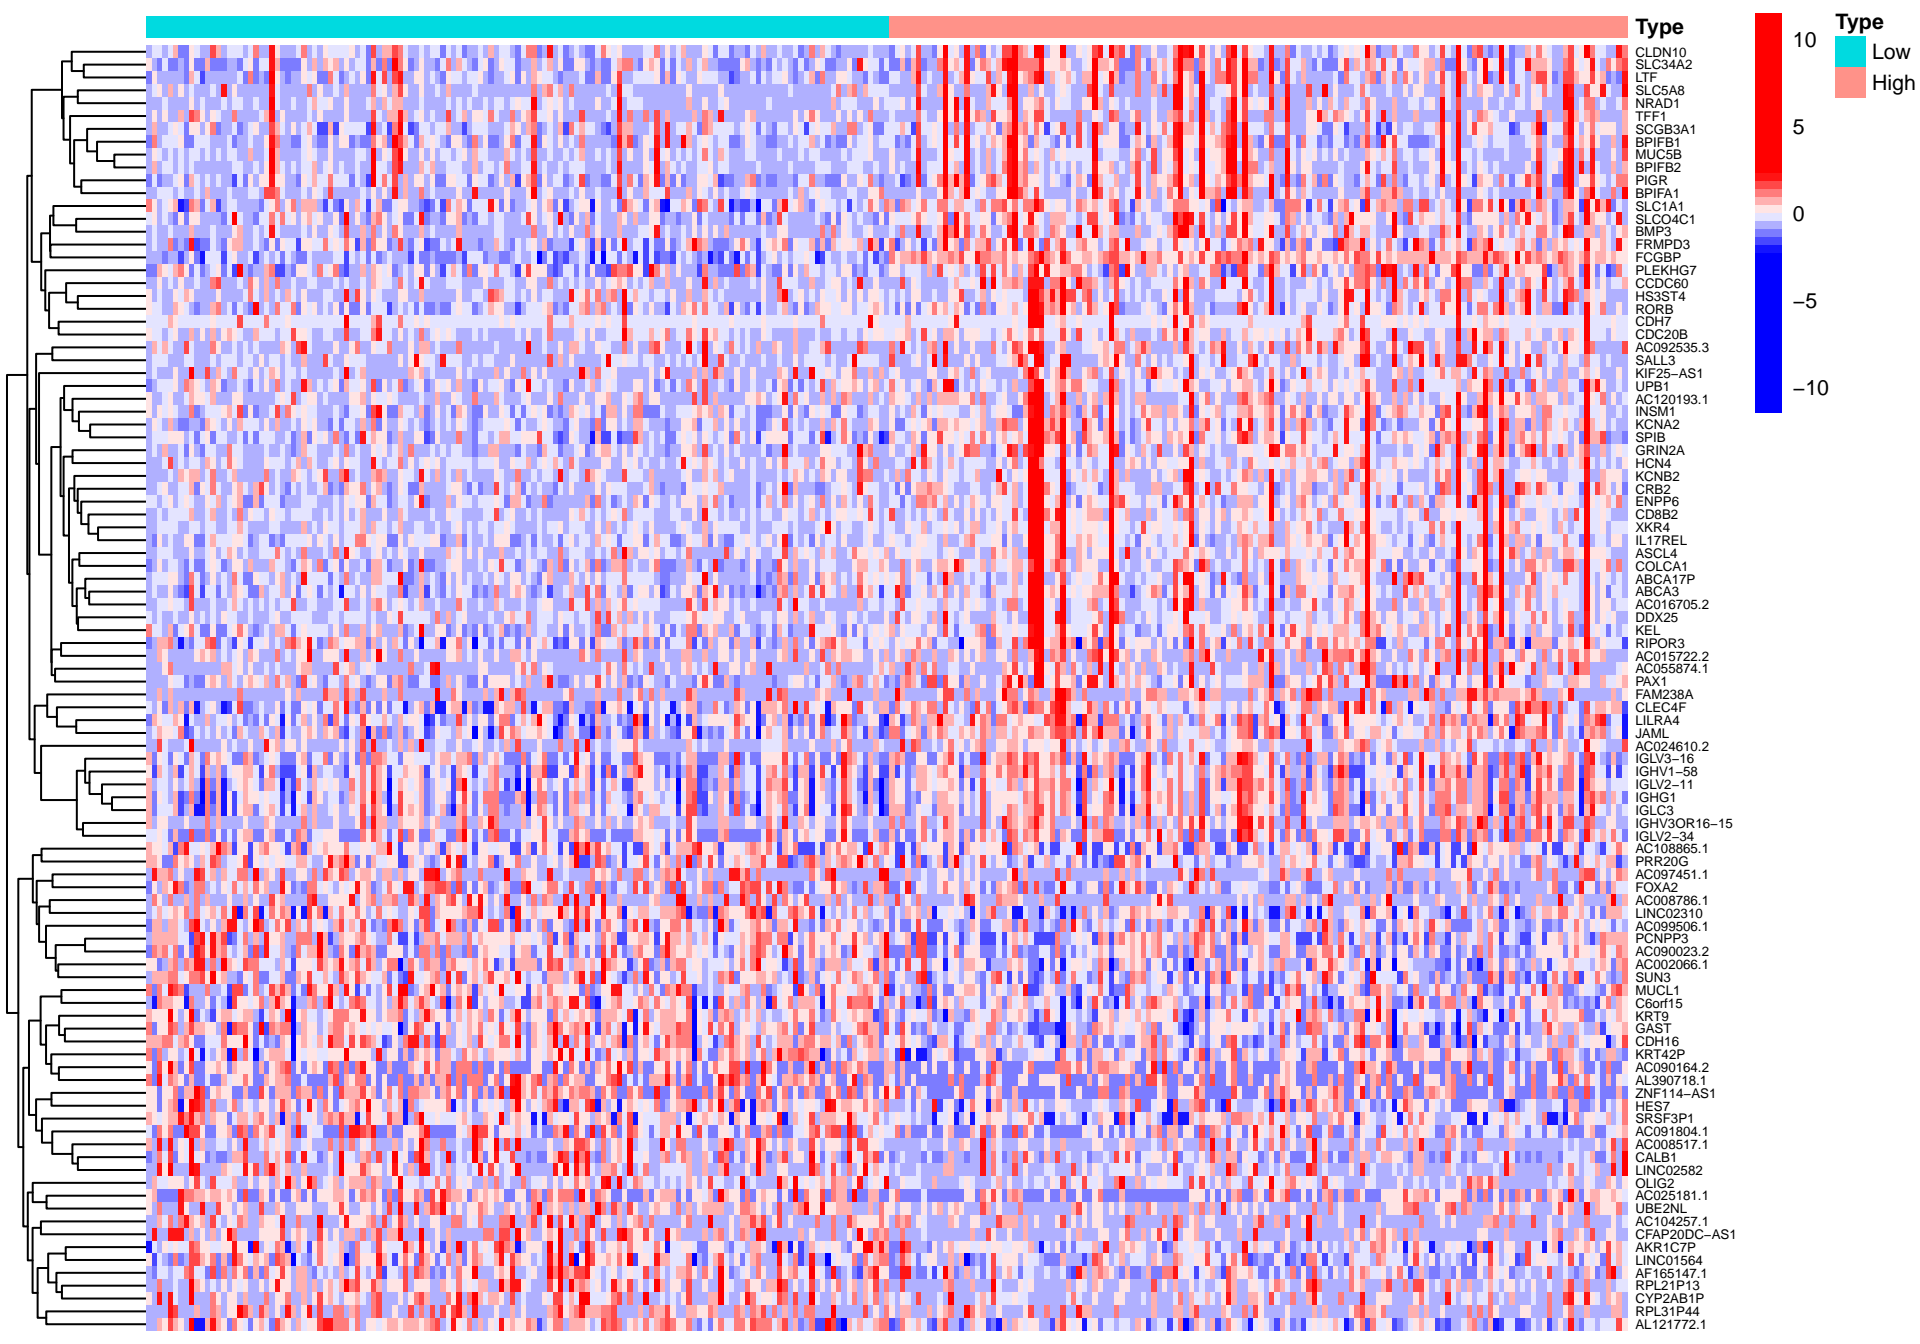

Supplement: f1 [file 8443392.f1.zip]

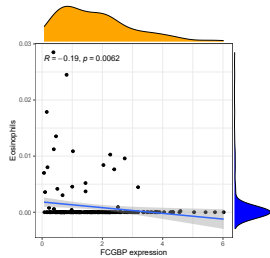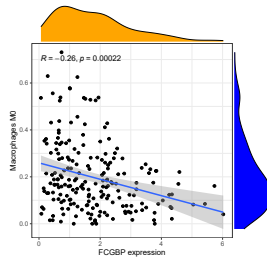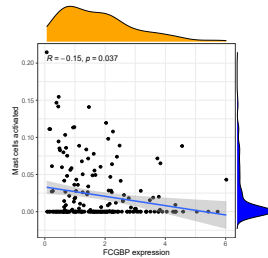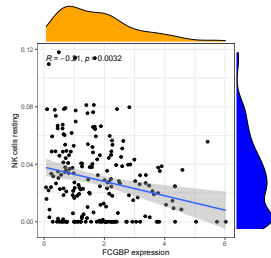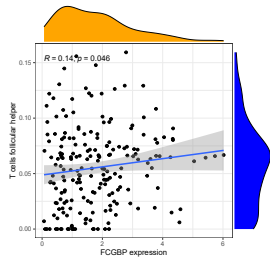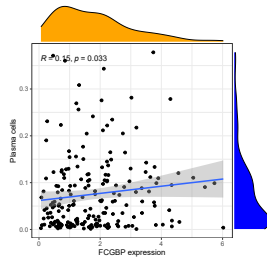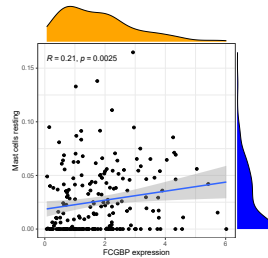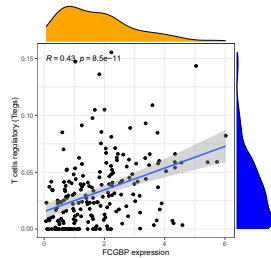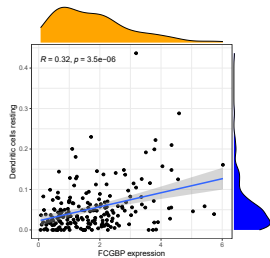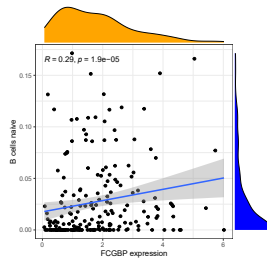

Supplement: f1 [file 8443392.f1.zip]
